# Supplementary material for: Ten‐Year Trend of Oral Anticoagulation Use in Postoperative and Nonpostoperative Atrial Fibrillation in Routine Clinical Practice
Source: PubMed Central journal article supplement — J Am Heart Assoc. 2024 Jun 27;13(13):e035708. doi: 10.1161/JAHA.124.035708 (PMC11255709; doi:10.1161/jaha.124.035708), 2024-06-27
Supplement: JAH3-13-e035708-s001.pdf [file JAH3-13-e035708-s001.pdf]

# Supplemental Material

**Table S1. Diagnosis and Procedure Codes Used in Determining Eligibility**

| <b>Diagnosis/Procedure Description</b> | <b>ICD-9 Diagnosis Codes</b> | <b>ICD-10 Diagnosis Codes</b>                                 | <b>CPT code</b>                                        | <b>ICD-9 Procedure Codes</b> | <b>ICD-10 Procedure Codes</b>                                                                              |
|----------------------------------------|------------------------------|---------------------------------------------------------------|--------------------------------------------------------|------------------------------|------------------------------------------------------------------------------------------------------------|
| Atrial fibrillation                    | 427.31                       | I48.0, I48.1x, I48.2x, I48.91                                 | -                                                      | -                            | -                                                                                                          |
| Atrial flutter                         | 427.32                       | I48.3, I48.4, I48.92                                          | -                                                      | -                            | -                                                                                                          |
| Native mitral stenosis                 | 394.0, 394.2, 396.0, 396.1   | I05.0, I05.2, I05.8, I05.9, I08.0, I08.1, I08.3, I34.2, Q23.2 | 92987                                                  | -                            | -                                                                                                          |
| Mechanical valve replacement           | 996.02, V43.3                | T82.0x                                                        | 33405                                                  | 35.22, 35.24, 35.26, 35.28   | O2RG0JZ, O2RG3JZ, O2RG4JZ, O2RF0JZ, O2RF4JZ, O2RH0JZ, O2RH4JZ, O2RJ0JZ, O2RJ4JZ                            |
| Bioprosthetic valve replacement        | 996.71, V42.2                | T82.22x, T82.6x, Z95.2x, Z95.3x                               | 33430, 33406, 33410, 33411, 33412, 33413, 33465, 33475 | 35.21, 35.23, 35.25, 35.27   | O2RG07Z, O2RG08Z, O2RG0KZ, O2RF07Z, O2RF08Z, O2RF0KZ, O2RH07Z, O2RH08Z, O2RH0KZ, O2RJ07Z, O2RJ08Z, O2RJ0KZ |

**Table S2. Categories of Surgeries Included in the Study**

| <b>Multi-level CCS Category</b> | <b>CCS Description</b>                     |
|---------------------------------|--------------------------------------------|
| 1                               | Operations on the nervous system           |
| 2                               | Operations on the endocrine system         |
| 3                               | Operations on the eye                      |
| 4                               | Operations on the ear                      |
| 5                               | Operations on the nose; mouth; and pharynx |
| 6                               | Operations on the respiratory system       |
| 7                               | Operations on the cardiovascular system    |
|                                 |                                            |
| 9                               | Operations on the digestive system         |
| 10                              | Operations on the urinary system           |
| 11                              | Operations on the male genital organs      |
| 12                              | Operations on the female genital organs    |
|                                 |                                            |
| 14                              | Operations on the musculoskeletal system   |
| 15                              | Operations on the integumentary system     |

Procedure codes, including International Classification of Diseases, Ninth Revision (ICD-9), International Classification of Diseases, Tenth Revision (ICD-10), Healthcare Common Procedure Coding System (HCPC), and Current Procedural Terminology (CPT), were linked to Clinical Classification Software (CCS) procedure categories that were used to define and categorize surgery.

**Table S3. Oral Anticoagulant Initiation by Surgical Category in POAF**

| <b>Surgical Category</b>                 | <b>N(%)<sup>1</sup></b> | <b>OAC Initiation,<br/>N(%)<sup>2</sup></b> | <b>OAC Initiation<br/>among men with<br/>CHA2DS2-VASc≥2<br/>or women with<br/>CHA2DS2-VASc≥3</b> |
|------------------------------------------|-------------------------|---------------------------------------------|--------------------------------------------------------------------------------------------------|
| Overall                                  | 118366 (100.0%)         | 42803 (36.2%)                               | 39131 (37.1%)                                                                                    |
| Operation on the Cardiovascular System   | 40586 (34.3%)           | 15832 (39.0%)                               | 14451 (39.2%)                                                                                    |
| Operation on the Digestive System        | 13663 (11.5%)           | 3772 (27.6%)                                | 3370 (29.2%)                                                                                     |
| Operation on the Ear                     | 2882 (2.4%)             | 1157 (40.2%)                                | 1068 (41.2%)                                                                                     |
| Operation on the Endocrine System        | 2983 (2.5%)             | 991 (33.2%)                                 | 916 (33.4%)                                                                                      |
| Operation on the Eye                     | 9016 (7.6%)             | 3539 (39.3%)                                | 3383 (39.8%)                                                                                     |
| Operation on the Genital Organs          | 2064 (1.7%)             | 590 (28.6%)                                 | 517 (33.0%)                                                                                      |
| Operation on the Integumentary System    | 9131 (7.7%)             | 2943 (32.2%)                                | 2689 (33.8%)                                                                                     |
| Operation on the Musculoskeletal System  | 27933 (23.6%)           | 10020 (35.9%)                               | 9015 (36.8%)                                                                                     |
| Operation on the Nervous System          | 9068 (7.7%)             | 2792 (30.8%)                                | 2485 (32.7%)                                                                                     |
| Operation on the Nose, Mouth and Pharynx | 11808(10.0%)            | 4620 (39.1%)                                | 4369 (39.7%)                                                                                     |
| Operation on the Respiratory System      | 2058 (1.7%)             | 521 (25.3%)                                 | 446 (26.3%)                                                                                      |
| Operation on the Urinary System          | 4232 (3.6%)             | 1231 (29.1%)                                | 1123 (30.2%)                                                                                     |

1. % is calculated as the % of patients undergoing a particular type of surgery among the post-op AF cohort.
2. % is calculated as the % of patients who initiated OAC within 90 days among patients who underwent a particular type of surgery

**Table S4. Factors Associated with OAC Initiation and Adherence in POAF**

|                                   | Initiation        |         | Adherence         |         | Discontinuation   |         |
|-----------------------------------|-------------------|---------|-------------------|---------|-------------------|---------|
|                                   | OR (95% CI)       | p-value | OR (95% CI)       | p-value | sHR (95% CI)      | p-value |
| <b>Age</b>                        |                   |         |                   |         |                   |         |
| 18-64 years                       | ref               | ref     | ref               | ref     | ref               | ref     |
| 65-74 years                       | 1.12 (1.08, 1.17) | <0.0001 | 1.09 (1.00, 1.17) | 0.0399  | 0.87 (0.84, 0.90) | <0.0001 |
| 75+ years                         | 1.21 (1.16, 1.26) | <0.0001 | 1.31 (1.21, 1.42) | <0.0001 | 0.82 (0.79, 0.85) | <0.0001 |
| <b>Female</b>                     | 1.00 (0.97, 1.03) | 0.9664  | 1.20 (1.14, 1.26) | <0.0001 | 0.89 (0.87, 0.91) | <0.0001 |
| <b>Race</b>                       |                   |         |                   |         |                   |         |
| White                             | ref               | ref     | ref               | ref     | ref               | ref     |
| Asian                             | 0.72 (0.66, 0.79) | <0.0001 | 0.88 (0.74, 1.06) | 0.1717  | 1.12 (1.02, 1.23) | 0.0131  |
| Black                             | 0.86 (0.82, 0.90) | <0.0001 | 0.87 (0.81, 0.94) | 0.0004  | 1.10 (1.06, 1.15) | <0.0001 |
| Hispanic/Latino                   | 0.80 (0.76, 0.84) | <0.0001 | 0.81 (0.75, 0.89) | <0.0001 | 1.14 (1.09, 1.19) | <0.0001 |
| Other/Unknown                     | 0.87 (0.80, 0.94) | 0.0005  | 0.96 (0.83, 1.12) | 0.6263  | 1.03 (0.96, 1.11) | 0.3780  |
| <b>Year of AF Diagnosis</b>       |                   |         |                   |         |                   |         |
| 2012                              | ref               | ref     | ref               | ref     | ref               | ref     |
| 2013                              | 0.99 (0.92, 1.06) | 0.7521  | 1.01 (0.88, 1.17) | 0.8481  | 0.96 (0.90, 1.03) | 0.2190  |
| 2014                              | 1.05 (0.98, 1.14) | 0.1752  | 1.16 (1.01, 1.34) | 0.0334  | 0.88 (0.82, 0.94) | 0.0001  |
| 2015                              | 1.06 (0.99, 1.15) | 0.0956  | 1.23 (1.07, 1.40) | 0.0030  | 0.79 (0.74, 0.84) | <0.0001 |
| 2016                              | 1.18 (1.10, 1.26) | <0.0001 | 1.30 (1.15, 1.49) | 0.0001  | 0.73 (0.69, 0.78) | <0.0001 |
| 2017                              | 1.21 (1.13, 1.29) | <0.0001 | 1.64 (1.46, 1.86) | <0.0001 | 0.69 (0.65, 0.73) | <0.0001 |
| 2018                              | 1.54 (1.44, 1.64) | <0.0001 | 1.61 (1.43, 1.81) | <0.0001 | 0.69 (0.65, 0.73) | <0.0001 |
| 2019                              | 1.61 (1.51, 1.72) | <0.0001 | 1.72 (1.53, 1.94) | <0.0001 | 0.68 (0.65, 0.73) | <0.0001 |
| 2020                              | 1.93 (1.80, 2.06) | <0.0001 | 1.86 (1.65, 2.10) | <0.0001 | 0.68 (0.64, 0.72) | <0.0001 |
| 2021                              | 2.01 (1.88, 2.14) | <0.0001 | 1.79 (1.58, 2.02) | <0.0001 | 0.71 (0.67, 0.75) | <0.0001 |
| <b>Medical History</b>            |                   |         |                   |         |                   |         |
| Heart Failure                     | 1.08 (1.05, 1.11) | <0.0001 | 0.98 (0.93, 1.04) | 0.5987  | 1.03 (1.00, 1.07) | 0.0265  |
| Hypertension                      | 1.09 (1.03, 1.15) | 0.0030  | 1.13 (1.02, 1.24) | 0.0141  | 0.89 (0.85, 0.93) | <0.0001 |
| Diabetes mellitus                 | 1.04 (1.01, 1.06) | 0.0136  | 1.01 (0.97, 1.07) | 0.5573  | 0.99 (0.96, 1.01) | 0.3905  |
| Thromboembolism                   | 1.11 (1.07, 1.15) | <0.0001 | 1.13 (1.06, 1.20) | 0.0001  | 0.92 (0.89, 0.95) | <0.0001 |
| Other supraventricular arrhythmia | 0.81 (0.77, 0.86) | <0.0001 | 1.06 (0.96, 1.17) | 0.2847  | 1.01 (0.96, 1.06) | 0.8146  |

|                                     | Initiation        |         | Adherence         |         | Discontinuation   |         |
|-------------------------------------|-------------------|---------|-------------------|---------|-------------------|---------|
|                                     | OR (95% CI)       | p-value | OR (95% CI)       | p-value | sHR (95% CI)      | p-value |
| Ventricular arrhythmia              | 0.86 (0.81, 0.90) | <0.0001 | 1.01 (0.91, 1.11) | 0.8723  | 0.96 (0.91, 1.01) | 0.1132  |
| CAD                                 | 0.78 (0.76, 0.80) | <0.0001 | 0.81 (0.76, 0.85) | <0.0001 | 1.12 (1.09, 1.15) | <0.0001 |
| PAD                                 | 1.00 (0.97, 1.04) | 0.8705  | 0.98 (0.92, 1.04) | 0.5157  | 1.06 (1.03, 1.10) | 0.0004  |
| Major bleeding                      | 0.98 (0.93, 1.04) | 0.5255  | 1.05 (0.95, 1.16) | 0.3091  | 1.01 (0.96, 1.06) | 0.7868  |
| Stage 3-5 CKD                       | 1.03 (1.00, 1.07) | 0.0735  | 1.02 (0.96, 1.09) | 0.4939  | 1.02 (0.98, 1.05) | 0.3468  |
| Liver disease                       | 0.95 (0.91, 0.99) | 0.0202  | 0.95 (0.88, 1.02) | 0.1778  | 1.05 (1.01, 1.09) | 0.0209  |
| Non-skin cancer                     | 0.94 (0.91, 0.97) | 0.0001  | 0.95 (0.90, 1.01) | 0.1027  | 1.08 (1.05, 1.11) | <0.0001 |
| Fall                                | 0.92 (0.89, 0.96) | <0.0001 | 0.95 (0.90, 1.01) | 0.0992  | 1.11 (1.07, 1.14) | <0.0001 |
| Anemia                              | 0.90 (0.87, 0.92) | <0.0001 | 0.90 (0.86, 0.95) | 0.0001  | 1.11 (1.08, 1.14) | <0.0001 |
| Alcoholism                          | 0.88 (0.83, 0.93) | <0.0001 | 0.90 (0.81, 1.01) | 0.0639  | 1.08 (1.02, 1.14) | 0.0095  |
| Concomitant use of antiplatelet     | 0.79 (0.76, 0.82) | <0.0001 | 1.15 (1.06, 1.24) | 0.0004  | 0.93 (0.89, 0.97) | 0.0004  |
| <b>Contraindications of OAC use</b> |                   |         |                   |         |                   |         |
| Intracranial bleeding               | 0.80 (0.72, 0.87) | <0.0001 | 0.92 (0.77, 1.11) | 0.3852  | 0.97 (0.88, 1.07) | 0.5092  |
| Recent bleed event                  | 0.60 (0.55, 0.66) | <0.0001 | 0.91 (0.76, 1.10) | 0.3308  | 1.12 (1.02, 1.22) | 0.0198  |
| Cerebral amyloid angiopathy         | 0.24 (0.08, 0.71) | 0.0098  | 0.34 (0.03, 3.89) | 0.3882  | 1.95 (0.54, 7.00) | 0.3077  |
| Cerebral aneurysm                   | 0.88 (0.76, 1.02) | 0.0840  | 1.24 (0.92, 1.67) | 0.1533  | 1.00 (0.86, 1.15) | 0.9557  |
| Pericarditis/pericardial effusions  | 0.79 (0.61, 1.02) | 0.0714  | 0.90 (0.55, 1.47) | 0.6718  | 1.07 (0.82, 1.40) | 0.6179  |
| Renal failure requiring dialysis    | 0.81 (0.74, 0.89) | <0.0001 | 0.76 (0.63, 0.91) | 0.0027  | 1.29 (1.19, 1.40) | <0.0001 |
| Coagulation defects                 | 1.63 (1.54, 1.73) | <0.0001 | 1.34 (1.21, 1.49) | <0.0001 | 0.80 (0.76, 0.84) | <0.0001 |
| End stage liver disease             | 0.92 (0.86, 0.99) | 0.0165  | 1.09 (0.96, 1.24) | 0.1646  | 0.97 (0.92, 1.04) | 0.4132  |
| GI cancer                           | 1.00 (0.95, 1.05) | 0.8684  | 0.92 (0.83, 1.01) | 0.0930  | 1.03 (0.98, 1.08) | 0.2901  |
| Other GI contraindications          | 0.94 (0.89, 1.00) | 0.0375  | 0.93 (0.83, 1.03) | 0.1713  | 1.00 (0.95, 1.06) | 0.9753  |
| <b>Provider Specialty</b>           |                   |         |                   |         |                   |         |
| Surgery and Others                  | ref               | ref     | ref               | ref     | ref               | ref     |
| Cardiology                          | 2.94 (2.83, 3.05) | <0.0001 | 1.21 (1.12, 1.30) | <0.0001 | 0.79 (0.76, 0.82) | <0.0001 |
| Primary Care                        | 1.36 (1.31, 1.42) | <0.0001 | 1.01 (0.93, 1.10) | 0.7984  | 0.89 (0.85, 0.93) | <0.0001 |
| <b>Cardiovascular Surgery</b>       | 1.05 (1.02, 1.09) | 0.0004  | 0.81 (0.77, 0.85) | <0.0001 | 1.10 (1.07, 1.13) | <0.0001 |

sHR: subdistribution hazard ratio; OR and 95% CI were obtained from multivariable logistic regression models. sHR and 95% CI were obtained from multivariable time-to-event analyses considering mortality as the competing risk using the Fine and Gray method.

**Table S5. Factors Associated with OAC Initiation and Adherence in Non-POAF**

|                                   | Initiation        |         | Adherence         |         | Discontinuation   |         |
|-----------------------------------|-------------------|---------|-------------------|---------|-------------------|---------|
|                                   | OR (95% CI)       | p-value | OR (95% CI)       | p-value | sHR (95% CI)      | p-value |
| <b>Age</b>                        |                   |         |                   |         |                   |         |
| 18-64 years                       | ref               | ref     | ref               | ref     | ref               | ref     |
| 65-74 years                       | 1.13 (1.10, 1.16) | <0.0001 | 1.19 (1.14, 1.24) | <0.0001 | 0.73 (0.72, 0.75) | <0.0001 |
| 75+ years                         | 1.12 (1.09, 1.15) | <0.0001 | 1.28 (1.23, 1.34) | <0.0001 | 0.77 (0.75, 0.78) | <0.0001 |
| <b>Female</b>                     | 0.98 (0.97, 1.00) | 0.0672  | 1.22 (1.18, 1.25) | <0.0001 | 0.87 (0.86, 0.88) | <0.0001 |
| <b>Race</b>                       |                   |         |                   |         |                   |         |
| White                             | ref               | ref     | ref               | ref     | ref               | ref     |
| Asian                             | 0.80 (0.75, 0.84) | <0.0001 | 0.84 (0.76, 0.92) | 0.0002  | 1.03 (0.98, 1.09) | 0.2023  |
| Black                             | 0.85 (0.83, 0.88) | <0.0001 | 0.77 (0.74, 0.80) | <0.0001 | 1.15 (1.13, 1.18) | <0.0001 |
| Hispanic/Latino                   | 0.83 (0.81, 0.86) | <0.0001 | 0.72 (0.69, 0.76) | <0.0001 | 1.17 (1.14, 1.20) | <0.0001 |
| Other/Unknown                     | 0.93 (0.88, 0.97) | 0.0029  | 0.90 (0.82, 0.98) | 0.0123  | 1.09 (1.05, 1.14) | 0.0001  |
| <b>Year of AF Diagnosis</b>       |                   |         |                   |         |                   |         |
| 2012                              | ref               | ref     | ref               | ref     | ref               | ref     |
| 2013                              | 1.03 (0.99, 1.08) | 0.1370  | 1.09 (1.01, 1.18) | 0.0288  | 0.96 (0.92, 0.99) | 0.0197  |
| 2014                              | 1.07 (1.03, 1.12) | 0.0019  | 1.11 (1.02, 1.20) | 0.0113  | 0.93 (0.89, 0.96) | 0.0001  |
| 2015                              | 1.08 (1.03, 1.12) | 0.0009  | 1.36 (1.26, 1.47) | <0.0001 | 0.80 (0.77, 0.83) | <0.0001 |
| 2016                              | 1.25 (1.20, 1.30) | <0.0001 | 1.45 (1.35, 1.56) | <0.0001 | 0.76 (0.74, 0.79) | <0.0001 |
| 2017                              | 1.28 (1.23, 1.33) | <0.0001 | 1.53 (1.43, 1.64) | <0.0001 | 0.74 (0.72, 0.77) | <0.0001 |
| 2018                              | 1.63 (1.57, 1.70) | <0.0001 | 1.48 (1.38, 1.58) | <0.0001 | 0.76 (0.74, 0.79) | <0.0001 |
| 2019                              | 1.84 (1.77, 1.91) | <0.0001 | 1.66 (1.55, 1.77) | <0.0001 | 0.74 (0.71, 0.76) | <0.0001 |
| 2020                              | 2.23 (2.14, 2.32) | <0.0001 | 1.61 (1.51, 1.72) | <0.0001 | 0.77 (0.75, 0.80) | <0.0001 |
| 2021                              | 2.64 (2.54, 2.75) | <0.0001 | 1.60 (1.50, 1.72) | <0.0001 | 0.86 (0.83, 0.88) | <0.0001 |
| <b>Medical History</b>            |                   |         |                   |         |                   |         |
| Heart Failure                     | 0.92 (0.91, 0.94) | <0.0001 | 0.91 (0.88, 0.94) | <0.0001 | 1.12 (1.10, 1.14) | <0.0001 |
| Hypertension                      | 1.16 (1.13, 1.20) | <0.0001 | 1.14 (1.08, 1.20) | <0.0001 | 0.79 (0.78, 0.81) | <0.0001 |
| Diabetes mellitus                 | 1.07 (1.05, 1.08) | <0.0001 | 0.96 (0.93, 0.99) | 0.0070  | 1.00 (0.98, 1.01) | 0.7271  |
| Thromboembolism                   | 1.06 (1.04, 1.09) | <0.0001 | 1.05 (1.01, 1.09) | 0.0151  | 0.98 (0.96, 1.00) | 0.0791  |
| Other supraventricular arrhythmia | 0.70 (0.68, 0.72) | <0.0001 | 1.06 (1.00, 1.12) | 0.0520  | 0.99 (0.96, 1.02) | 0.4205  |

|                                     | Initiation        |         | Adherence         |         | Discontinuation   |         |
|-------------------------------------|-------------------|---------|-------------------|---------|-------------------|---------|
|                                     | OR (95% CI)       | p-value | OR (95% CI)       | p-value | sHR (95% CI)      | p-value |
| Ventricular arrhythmia              | 0.80 (0.77, 0.83) | <0.0001 | 1.04 (0.97, 1.10) | 0.2931  | 0.97 (0.94, 1.00) | 0.0590  |
| CAD                                 | 0.81 (0.80, 0.82) | <0.0001 | 0.89 (0.87, 0.92) | <0.0001 | 1.05 (1.04, 1.07) | <0.0001 |
| PAD                                 | 0.94 (0.92, 0.97) | <0.0001 | 0.95 (0.91, 0.98) | 0.0061  | 1.09 (1.07, 1.11) | <0.0001 |
| Major bleeding                      | 0.95 (0.92, 0.99) | 0.0147  | 1.07 (1.00, 1.14) | 0.0458  | 1.00 (0.97, 1.03) | 0.9492  |
| Stage 3-5 CKD                       | 0.98 (0.96, 1.00) | 0.0640  | 0.96 (0.93, 1.00) | 0.0384  | 1.08 (1.06, 1.10) | <0.0001 |
| Liver disease                       | 0.93 (0.90, 0.96) | <0.0001 | 0.96 (0.92, 1.01) | 0.1171  | 1.03 (1.00, 1.05) | 0.0194  |
| Non-skin cancer                     | 0.97 (0.95, 0.99) | 0.0137  | 0.98 (0.95, 1.01) | 0.2405  | 1.05 (1.03, 1.07) | <0.0001 |
| Fall                                | 0.88 (0.86, 0.90) | <0.0001 | 0.91 (0.88, 0.94) | <0.0001 | 1.12 (1.10, 1.14) | <0.0001 |
| Anemia                              | 0.88 (0.86, 0.89) | <0.0001 | 0.92 (0.89, 0.95) | <0.0001 | 1.08 (1.06, 1.09) | <0.0001 |
| Alcoholism                          | 0.85 (0.82, 0.89) | <0.0001 | 0.77 (0.73, 0.83) | <0.0001 | 1.14 (1.10, 1.18) | <0.0001 |
| Concomitant use of antiplatelet     | 0.78 (0.76, 0.80) | <0.0001 | 1.14 (1.09, 1.20) | <0.0001 | 0.92 (0.90, 0.94) | <0.0001 |
| <b>Contraindications of OAC use</b> |                   |         |                   |         |                   |         |
| Intracranial bleeding               | 0.87 (0.82, 0.93) | <0.0001 | 0.99 (0.88, 1.11) | 0.8488  | 0.99 (0.94, 1.05) | 0.7450  |
| Recent bleed event                  | 0.53 (0.49, 0.57) | <0.0001 | 0.81 (0.70, 0.94) | 0.0064  | 1.17 (1.08, 1.26) | 0.0001  |
| Cerebral amyloid angiopathy         | 0.39 (0.24, 0.62) | 0.0001  | 1.93 (0.64, 5.82) | 0.2401  | 1.18 (0.80, 1.75) | 0.4128  |
| Cerebral aneurysm                   | 0.93 (0.85, 1.02) | 0.1359  | 0.94 (0.80, 1.12) | 0.5036  | 1.12 (1.03, 1.21) | 0.0088  |
| Pericarditis/pericardial effusions  | 0.78 (0.62, 0.98) | 0.0299  | 0.92 (0.61, 1.40) | 0.7082  | 1.24 (1.00, 1.52) | 0.0464  |
| Renal failure requiring dialysis    | 0.81 (0.75, 0.87) | <0.0001 | 0.75 (0.65, 0.86) | 0.0001  | 1.26 (1.17, 1.35) | <0.0001 |
| Coagulation defects                 | 1.87 (1.79, 1.95) | <0.0001 | 1.20 (1.12, 1.28) | <0.0001 | 0.82 (0.80, 0.85) | <0.0001 |
| End stage liver disease             | 1.02 (0.98, 1.07) | 0.2977  | 0.97 (0.90, 1.05) | 0.4918  | 1.02 (0.98, 1.06) | 0.3304  |
| GI cancer                           | 0.97 (0.94, 1.01) | 0.1190  | 0.96 (0.91, 1.03) | 0.2546  | 1.02 (0.98, 1.05) | 0.3341  |
| Other GI contraindications          | 0.98 (0.94, 1.02) | 0.3208  | 0.88 (0.82, 0.94) | 0.0002  | 1.04 (1.00, 1.07) | 0.0441  |
| <b>Provider Specialty</b>           |                   |         |                   |         |                   |         |
| Surgery and Others                  | ref               | ref     | ref               | ref     | ref               | ref     |
| Cardiology                          | 2.90 (2.83, 2.96) | <0.0001 | 1.05 (1.00, 1.09) | 0.0395  | 0.85 (0.83, 0.87) | <0.0001 |
| Primary Care                        | 1.27 (1.23, 1.30) | <0.0001 | 0.97 (0.93, 1.02) | 0.2679  | 0.91 (0.89, 0.93) | <0.0001 |

sHR: subdistribution hazard ratio; OR and 95% CI were obtained from multivariable logistic regression models. sHR and 95% CI were obtained from multivariable time-to-event analyses considering mortality as the competing risk using the Fine and Gray method.



**Table S6. Oral Anticoagulant Initiated within 90 days of AF diagnosis**

|                          | <b>Non-POAF<br/>(N=149,717)</b> | <b>POAF<br/>(N=42,803)</b> | <b>Total<br/>(N=192,520)</b> | <b>p-value</b> |
|--------------------------|---------------------------------|----------------------------|------------------------------|----------------|
| <b>Initial treatment</b> |                                 |                            |                              | <0.0001        |
| Apixaban                 | 82,273 (55.0%)                  | 22,527 (52.6%)             | 104,800 (54.4%)              |                |
| Dabigatran               | 5271 (3.5%)                     | 816 (1.9%)                 | 6087 (3.2%)                  |                |
| Edoxaban                 | 93 (0.1%)                       | 11 (0.0%)                  | 104 (0.1%)                   |                |
| Rivaroxaban              | 31,405 (21.0%)                  | 7197 (16.8%)               | 38,602 (20.1%)               |                |
| Warfarin                 | 30,675 (20.5%)                  | 12,252 (28.6%)             | 42,927 (22.3%)               |                |

These are aggregated data from 2012-2021. The data by year can be found in Figure 2.

**Table S7. Adherence to Oral Anticoagulants**

|                                                                                                              | <b>POAF</b>    | <b>Non-POAF</b> |
|--------------------------------------------------------------------------------------------------------------|----------------|-----------------|
| Overall                                                                                                      | N=32,697       | N=116,522       |
|                                                                                                              | 18,647 (57.0%) | 77,146 (66.2%)  |
| Men with CHA <sub>2</sub> DS <sub>2</sub> -VASc ≥ 2<br>and women with CHA <sub>2</sub> DS <sub>2</sub> -VASc | N=30,003       | N=99,989        |
| ≥ 3                                                                                                          | 17,343 (57.8%) | 68,260 (68.3%)  |

Adherence was measured by the proportion of days covered (PDC) at the end of one year. Patients with a PDC≥80% were considered as being adherent. When considering discontinuation or calculating the PDC, all OACs were considered regardless of whether the dose was changed, or the patient switched from one agent to another. The adherence analysis was limited to patients who started OAC within the first 90 days and had continuous enrollment for the first 12 months after the OAC initiation and did not die within the first 12 months.

**Figure S1. Cohort Creation Flow Diagram**

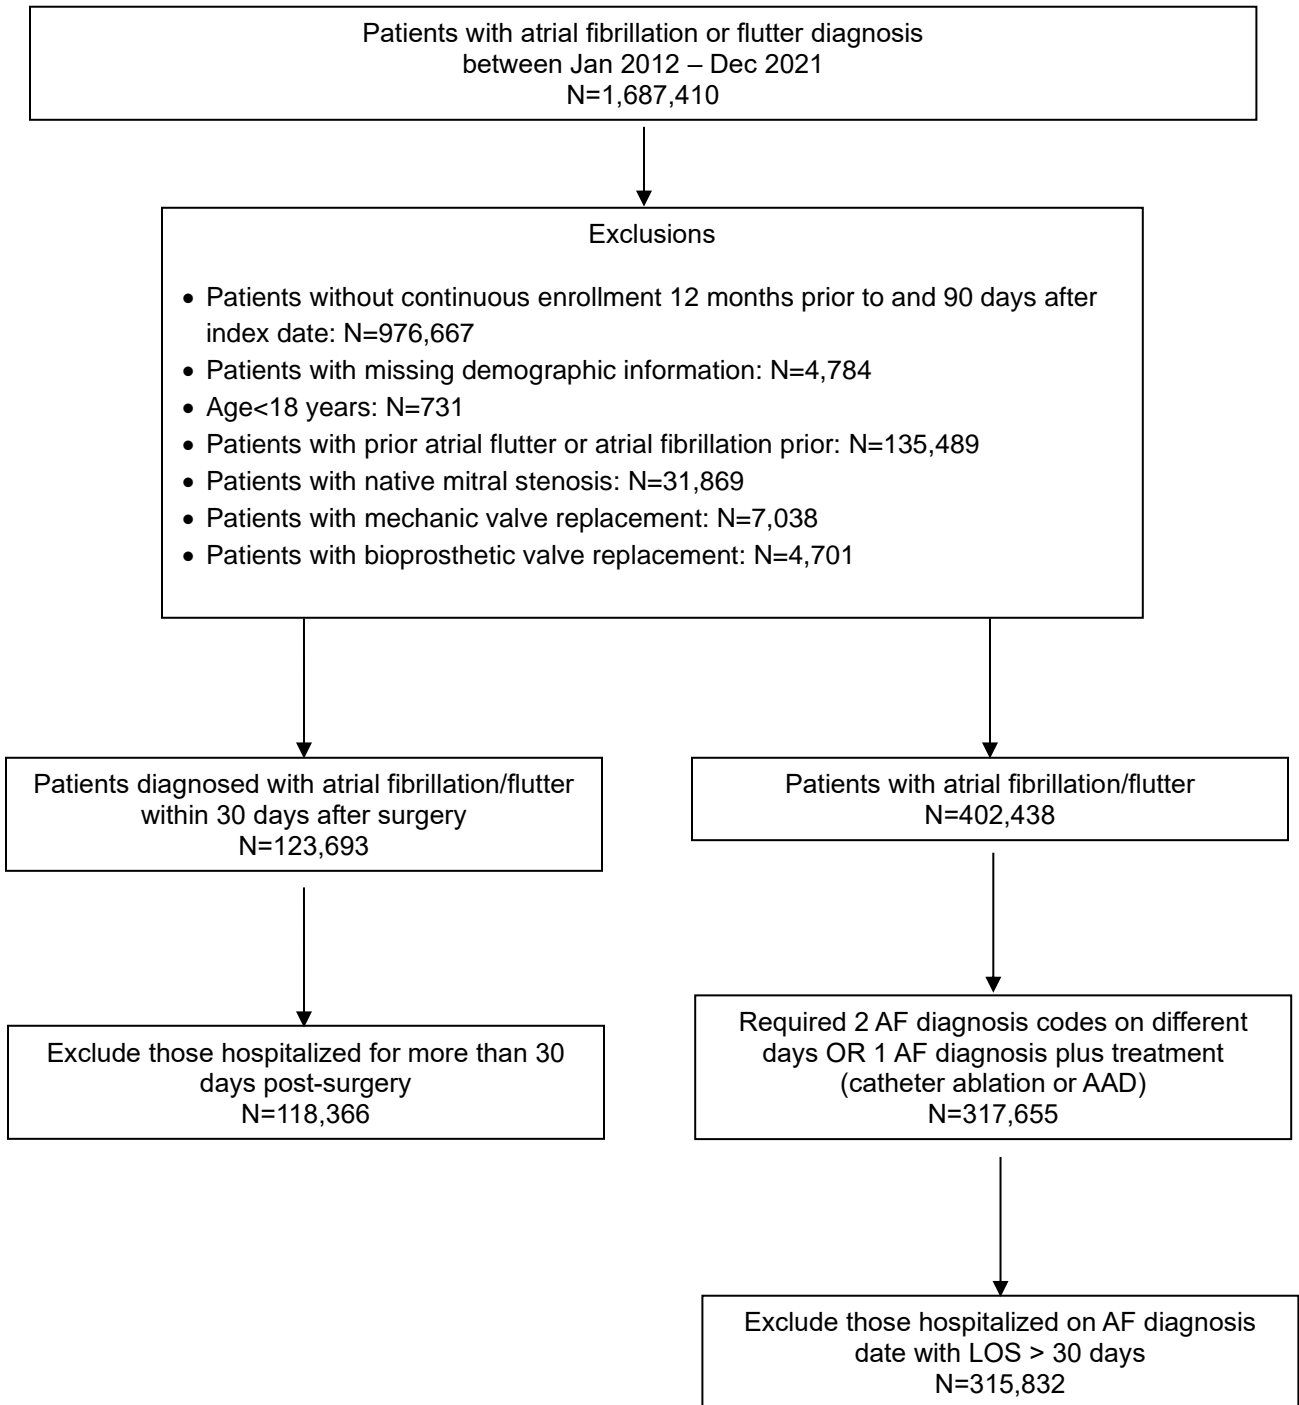

**Figure S2. Trends of OAC Initiation in Overall Cohort and in Patients with Class IA Recommendation**

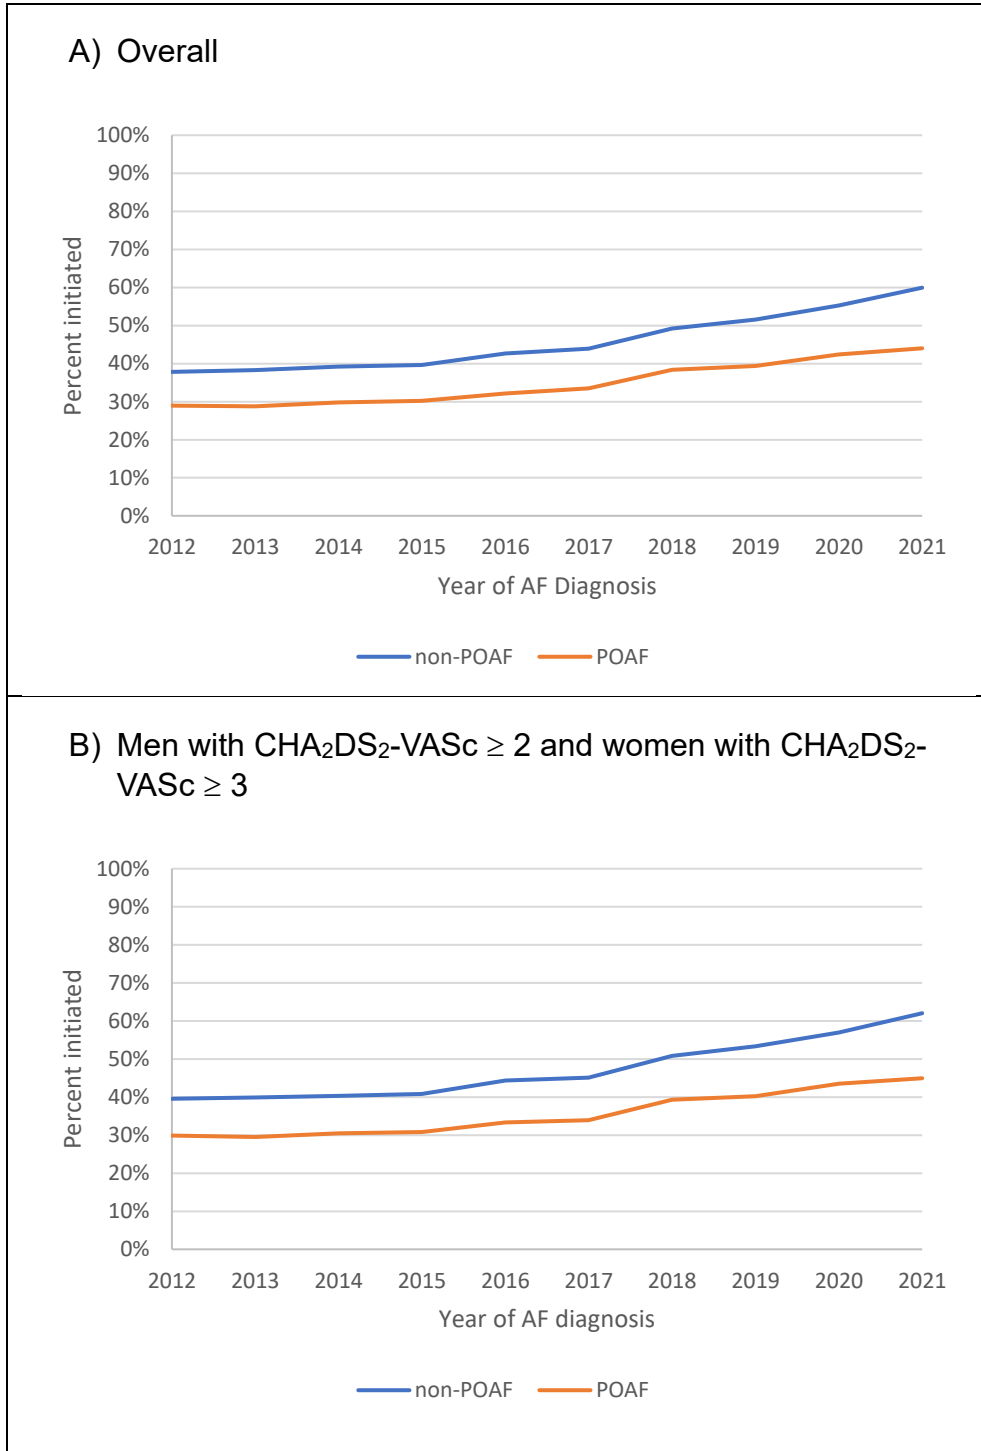

**Figure S3. Trends of OAC Initiation by Follow-Up Specialty in men with CHA<sub>2</sub>DS<sub>2</sub>-VASc  $\geq$ 2 and women with CHA<sub>2</sub>DS<sub>2</sub>-VASc  $\geq$ 3**

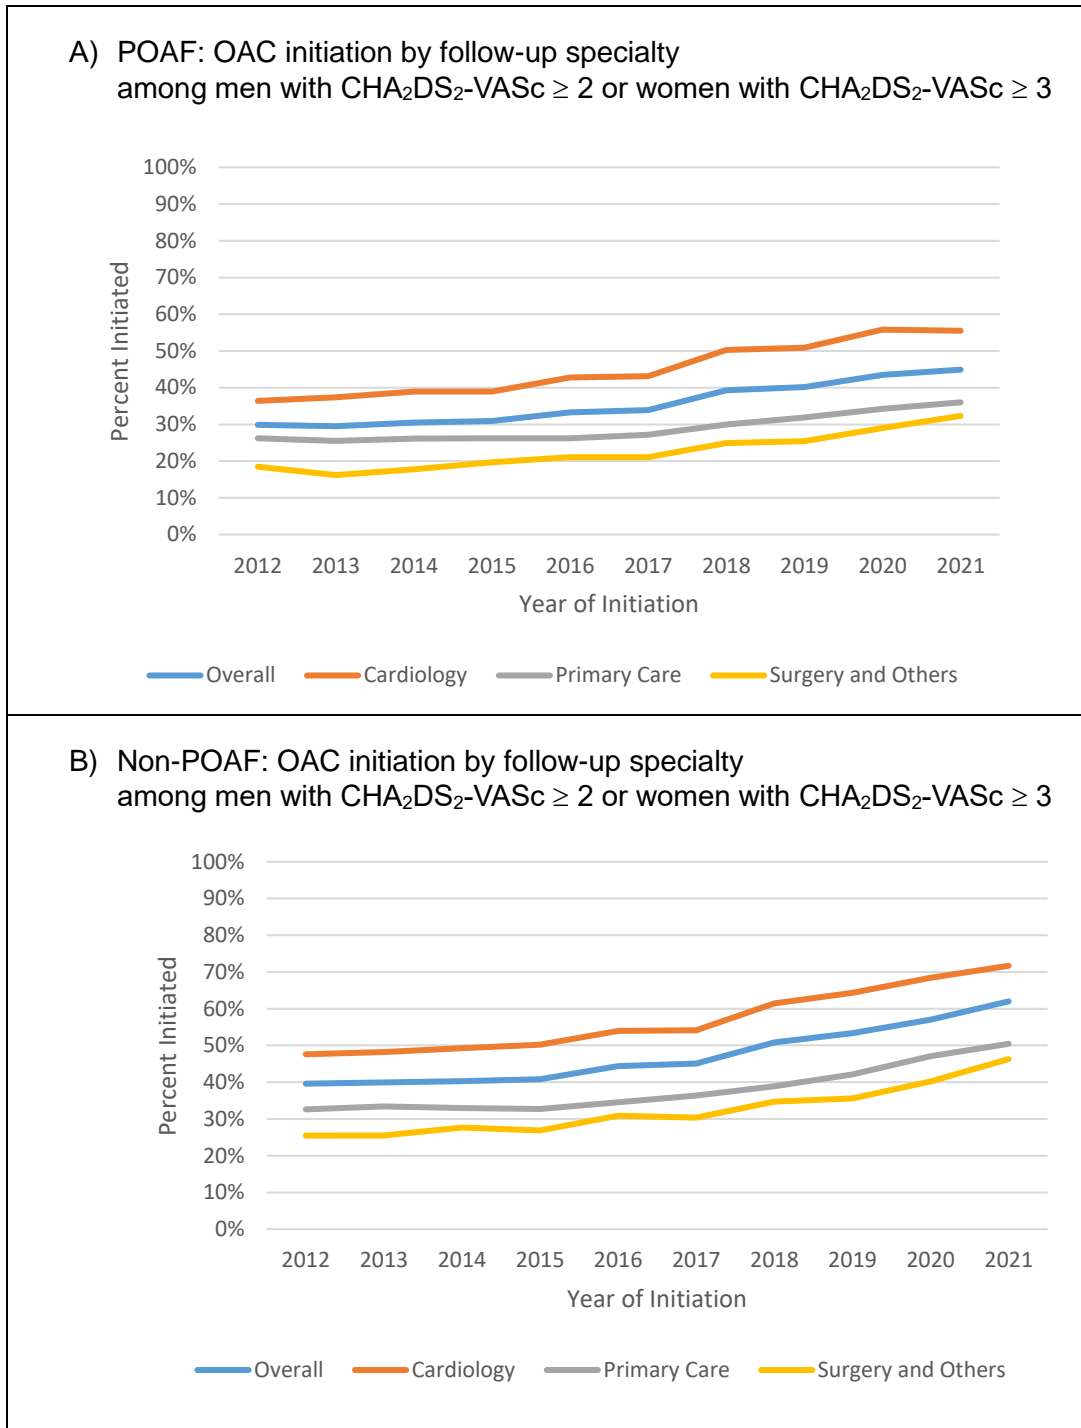

If a patient had a visit with a cardiologist within 90 days of the first AF diagnosis date, we classified the patient as in the cardiology group, if not and if the patient had a visit with a primary care clinician, we classified the patient as in the primary care group, and if the patient had neither cardiology or primary care visits, we classified the patients as in the “surgery and others” group.

**Figure S4. Discontinuation of OAC in POAF and Non-POAF**

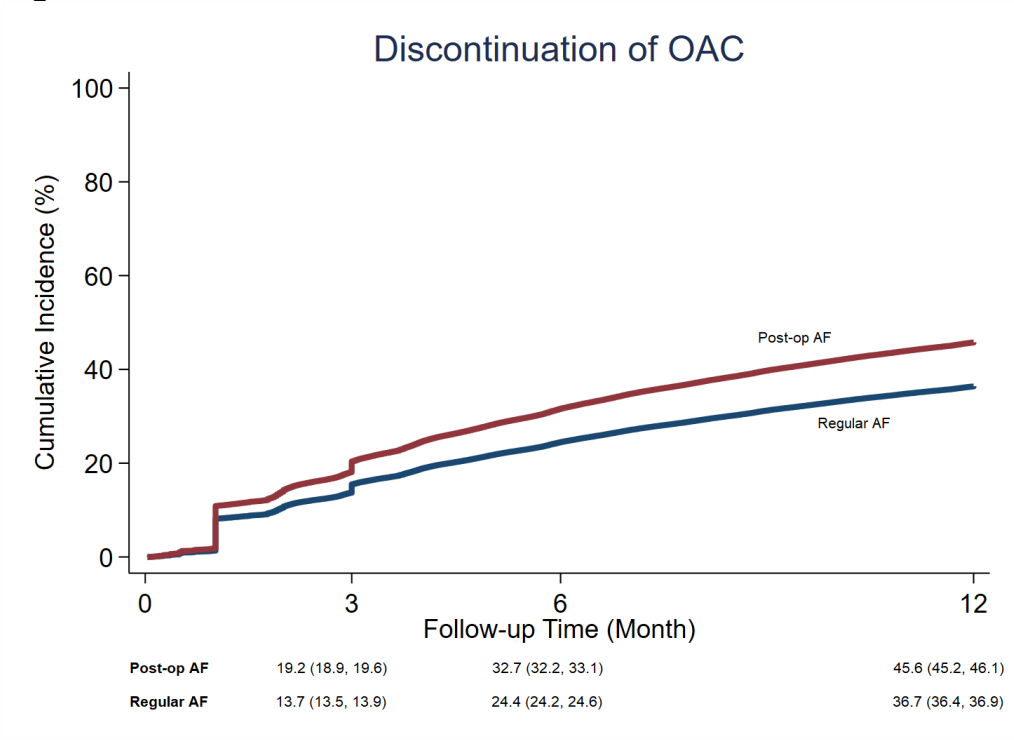

**Figure S5. Trends of OAC Adherence by Follow-Up Specialty, 2012-2021**

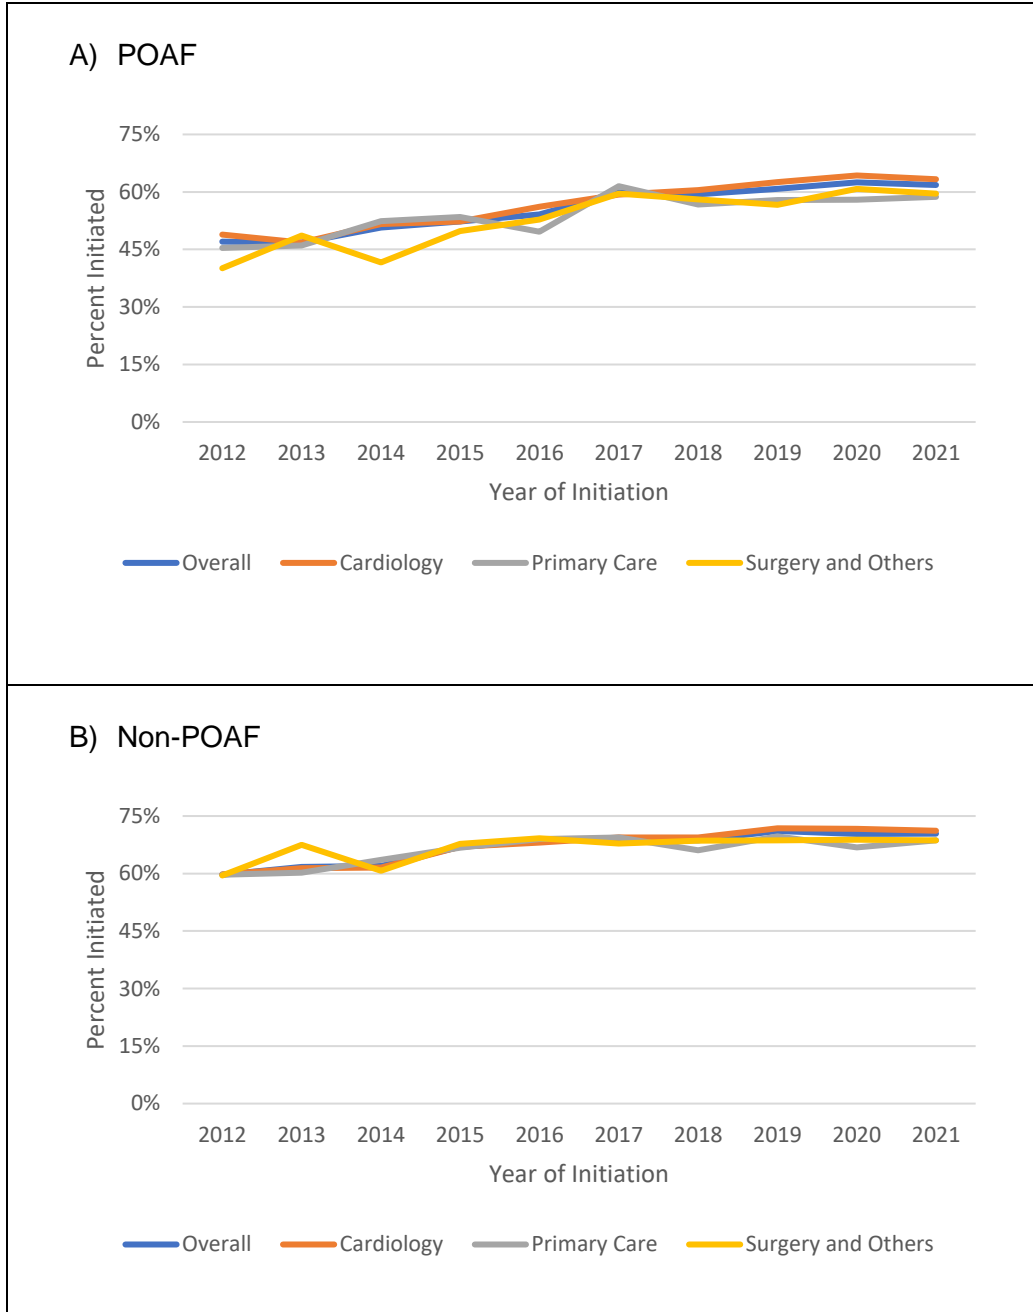

If a patient had a visit with a cardiologist within 90 days of the first AF diagnosis date, we classified the patient as in the cardiology group, if not and if the patient had a visit with a primary care clinician, we classified the patient as in the primary care group, and if the patient had neither cardiology or primary care visits, we classified the patients as in the “surgery and others” group.
